# Supplementary material
Source: PubMed Central journal article supplement (PMC9814497)
Supplement: 42004_2020_291_MOESM2_ESM.pdf [file 42004_2020_291_MOESM2_ESM.pdf]

|                    |      |      |      |      |      |      |      |      |
|--------------------|------|------|------|------|------|------|------|------|
| C(CO)O             | 2.01 | 1.82 | 2.07 | 2.32 | 1.79 | 1.59 | 1.89 | 2.19 |
| CC(=O)CC1=CC=CC=C1 | 3.05 | 2.87 | 3.40 | 3.92 | 2.91 | 2.73 | 3.26 | 3.78 |
| C(=O)N             | 4.19 | 3.96 | 4.53 | 5.10 | 4.19 | 3.95 | 4.53 | 5.11 |
| C=CC=O             | 3.73 | 3.38 | 3.92 | 4.46 | 3.65 | 3.37 | 3.95 | 4.52 |
| C1COCO1            | 1.35 | 1.17 | 1.35 | 1.53 | 1.36 | 1.18 | 1.37 | 1.55 |
| CC(=O)OC(=O)C      | 4.35 | 4.03 | 4.65 | 5.28 | 4.42 | 4.10 | 4.77 | 5.43 |
| C(CO)CO            | 3.71 | 3.32 | 3.75 | 4.17 | 3.40 | 3.01 | 3.50 | 3.99 |
| CCC(=O)CC          | 2.99 | 2.80 | 3.38 | 3.96 | 2.95 | 2.77 | 3.38 | 3.99 |
| CC1=CC=CC=C1C      | 0.47 | 0.70 | 0.89 | 1.08 | 0.45 | 0.68 | 0.88 | 1.07 |
| CCCCCC             | 0.00 | 0.00 | 0.00 | 0.00 | 0.00 | 0.00 | 0.00 | 0.00 |
| CCC(CC)O           | 1.96 | 1.81 | 2.08 | 2.35 | 1.74 | 1.58 | 1.91 | 2.24 |
| NCCO               | 1.50 | 1.29 | 1.42 | 1.55 | 1.26 | 1.09 | 1.22 | 1.35 |
| CCCCCC             | 0.03 | 0.04 | 0.07 | 0.10 | 0.07 | 0.07 | 0.12 | 0.17 |
| CCCCCCCC           | 0.00 | 0.00 | 0.00 | 0.00 | 0.00 | 0.00 | 0.00 | 0.00 |
| CCCCCCCC           | 0.00 | 0.00 | 0.00 | 0.00 | 0.00 | 0.00 | 0.00 | 0.00 |
| c1ccccc1           | 0.00 | 0.00 | 0.00 | 0.00 | 0.00 | 0.00 | 0.00 | 0.00 |
| CCCCNCCCC          | 1.46 | 1.35 | 1.51 | 1.68 | 0.98 | 0.87 | 1.12 | 1.37 |
| OCCCCO             | 0.00 | 0.00 | 0.00 | 0.00 | 0.00 | 0.00 | 0.00 | 0.00 |
| OCC(O)CO           | 4.29 | 3.85 | 4.35 | 4.85 | 4.03 | 3.58 | 4.15 | 4.72 |
| C1CCNCC1           | 1.30 | 1.16 | 1.44 | 1.72 | 1.35 | 1.23 | 1.52 | 1.81 |
| OCCCCCO            | 3.71 | 3.31 | 3.75 | 4.18 | 3.35 | 2.96 | 3.43 | 3.90 |
| CC(=O)c1ccc(C)cc1  | 3.87 | 3.74 | 3.86 | 3.97 | 3.64 | 3.53 | 3.69 | 3.85 |
| CNCCCN             | 3.11 | 2.80 | 3.16 | 3.52 | 2.54 | 2.17 | 2.67 | 3.17 |
| CN(C)CCCN          | 1.61 | 1.41 | 1.61 | 1.81 | 1.33 | 1.16 | 1.40 | 1.63 |
| CCN(CC)CCCN        | 1.67 | 1.52 | 1.75 | 1.98 | 1.54 | 1.38 | 1.63 | 1.87 |
| CCn1ccnc1          | 4.26 | 4.25 | 5.01 | 5.76 | 4.27 | 4.29 | 5.06 | 5.83 |
| CN=C=O             | 3.18 | 2.95 | 3.33 | 3.69 | 3.14 | 2.92 | 3.29 | 3.65 |
| OCC#CCO            | 0.98 | 0.87 | 1.02 | 1.17 | 1.05 | 0.95 | 0.98 | 1.01 |
| N#Cc1ccc1          | 5.14 | 4.81 | 5.63 | 6.45 | 5.15 | 4.84 | 5.67 | 6.49 |
| Cc1cccn1           | 4.26 | 4.01 | 4.84 | 5.67 | 4.31 | 4.10 | 5.03 | 5.95 |
| O=Cc1ccc1          | 3.02 | 2.96 | 3.45 | 3.93 | 2.89 | 2.89 | 3.41 | 3.93 |
| Cc1ccc(C)n1C       | 2.12 | 2.22 | 2.36 | 2.50 | 2.07 | 2.18 | 2.32 | 2.46 |
| CC(=O)c1ccc1       | 3.67 | 3.53 | 3.78 | 4.03 | 3.49 | 3.32 | 3.57 | 3.81 |
| CN1CCN(C)CC1       | 0.00 | 0.00 | 0.00 | 0.00 | 0.00 | 0.00 | 0.00 | 0.00 |
| OCCCCCO            | 0.00 | 0.00 | 0.00 | 0.00 | 0.00 | 0.00 | 0.00 | 0.00 |
| c1cn2ccnc2cn1      | 3.84 | 3.72 | 4.57 | 5.42 | 3.83 | 3.73 | 4.60 | 5.46 |

|                                 |      |      |      |      |      |      |      |      |
|---------------------------------|------|------|------|------|------|------|------|------|
| <chem>CCCCn1ccnc1</chem>        | 4.36 | 4.40 | 5.11 | 5.82 | 4.42 | 4.49 | 5.21 | 5.93 |
| <chem>CC(=O)CCC=C(C)C</chem>    | 3.03 | 2.80 | 3.32 | 3.83 | 2.98 | 2.75 | 3.30 | 3.84 |
| <chem>c1ccc2ccccc2c1</chem>     | 0.00 | 0.00 | 0.00 | 0.00 | 0.00 | 0.00 | 0.00 | 0.00 |
| <chem>c1ccc2ncnc2c1</chem>      | 0.27 | 0.50 | 0.63 | 0.76 | 0.26 | 0.50 | 0.63 | 0.76 |
| <chem>OCCCCCCCO</chem>          | 3.34 | 2.93 | 3.42 | 3.90 | 3.35 | 2.96 | 3.46 | 3.96 |
| <chem>CC(C)(C)c1ccncc1</chem>   | 2.85 | 2.89 | 3.46 | 4.02 | 2.85 | 2.91 | 3.49 | 4.06 |
| <chem>Cc1ccc2c(c1)OCO2</chem>   | 0.85 | 0.67 | 0.73 | 0.79 | 0.65 | 0.43 | 0.52 | 0.61 |
| <chem>CCCCC(=O)CCCC</chem>      | 2.95 | 2.76 | 3.40 | 4.05 | 2.85 | 2.67 | 3.37 | 4.07 |
| <chem>O=C1CCc2ccccc2C1</chem>   | 3.31 | 2.98 | 3.38 | 3.78 | 3.27 | 2.95 | 3.36 | 3.77 |
| <chem>OCCCCCCCCO</chem>         | 0.00 | 0.00 | 0.00 | 0.00 | 0.00 | 0.00 | 0.00 | 0.00 |
| <chem>CC(C)(O)CCC(C)(C)O</chem> | 0.00 | 0.00 | 0.00 | 0.00 | 0.00 | 0.00 | 0.00 | 0.00 |
| <chem>NCCNCCNCCN</chem>         | 3.08 | 2.75 | 2.98 | 3.20 | 2.30 | 1.94 | 2.30 | 2.65 |

## 2. Per molecule error analysis

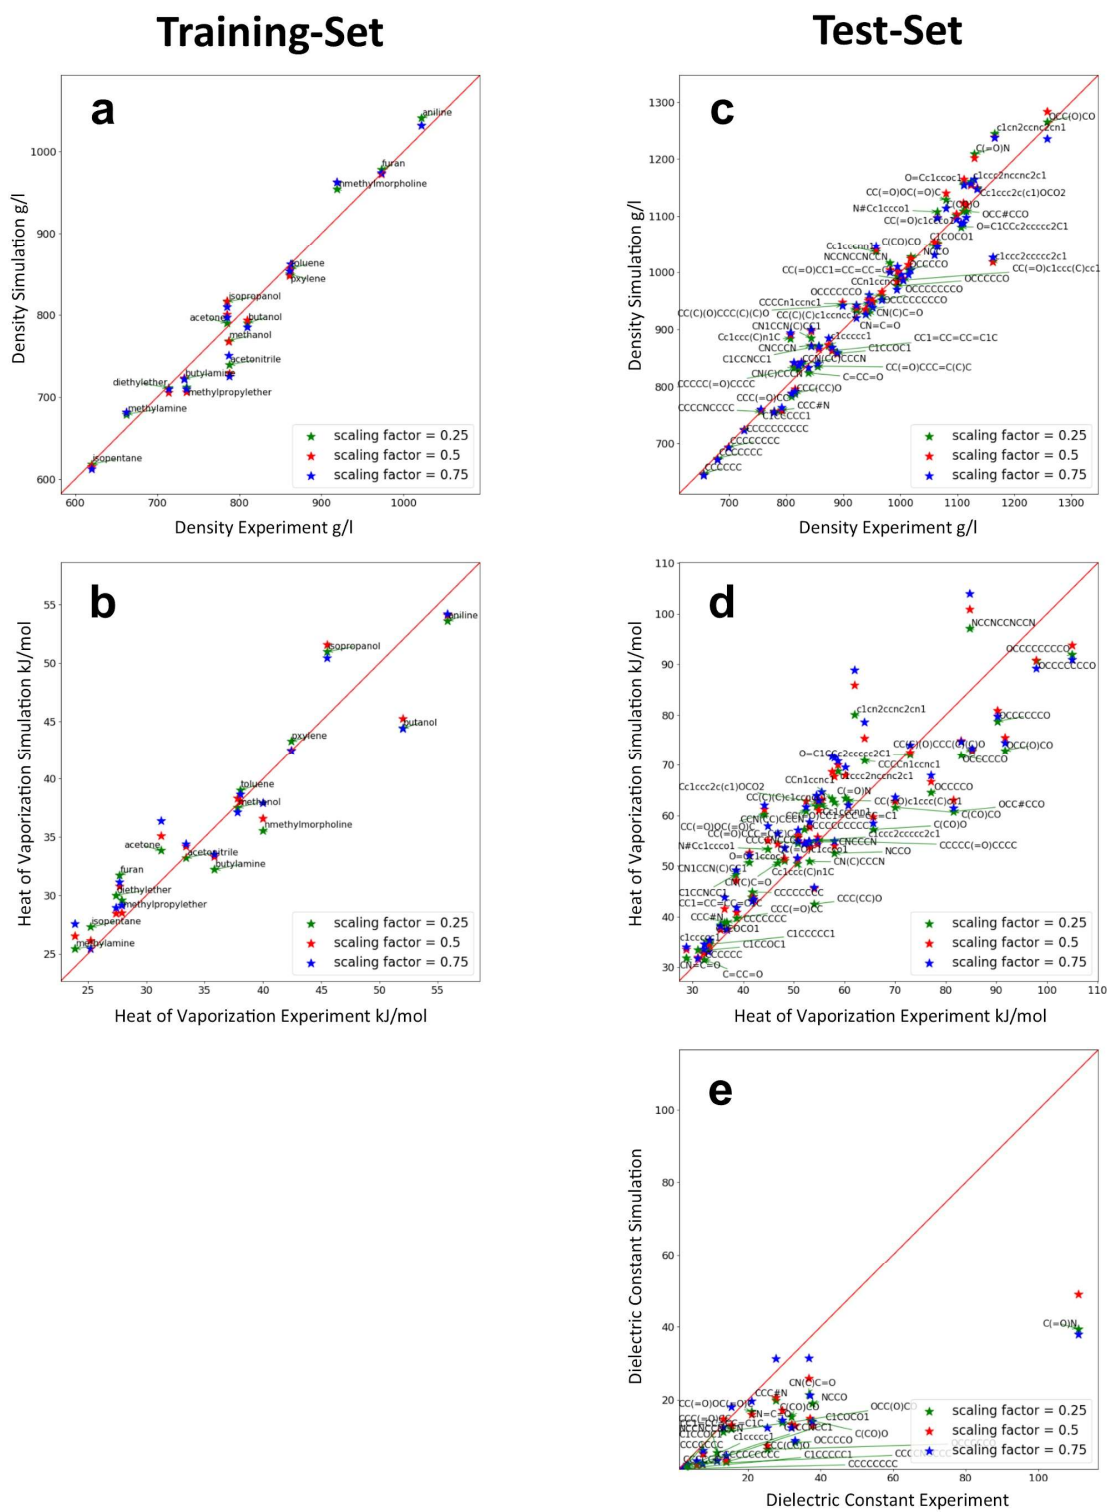

**Supplementary Figure 1: Comparison of experimental and simulated results per molecule.** Results for the training-set (A,B) and the test-set (C-E) are shown. Densities are shown in A and C, Heats of vaporization in B and D, and dielectric constants in E.

### 3. Point charge dipole moments with RESP2<sub>0.50</sub>

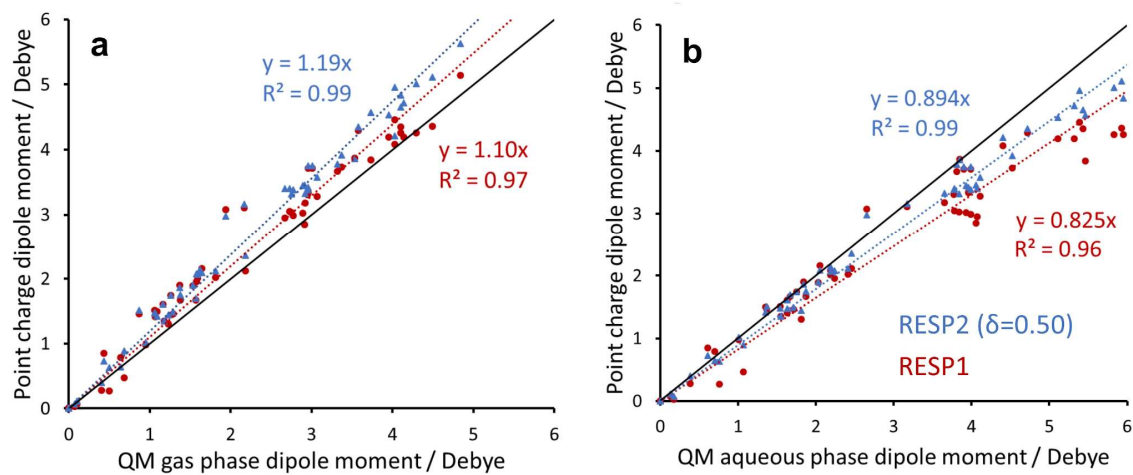

**Supplementary Figure 2: Comparison of molecular dipoles moments:** Scatter plots of molecular dipole moments based on RESP1 and RESP2<sub>0.50</sub> charges plotted against the dipole moments from the gas-phase and aqueous QM calculation.

## 4. Molecules used for quantum method benchmarking

---

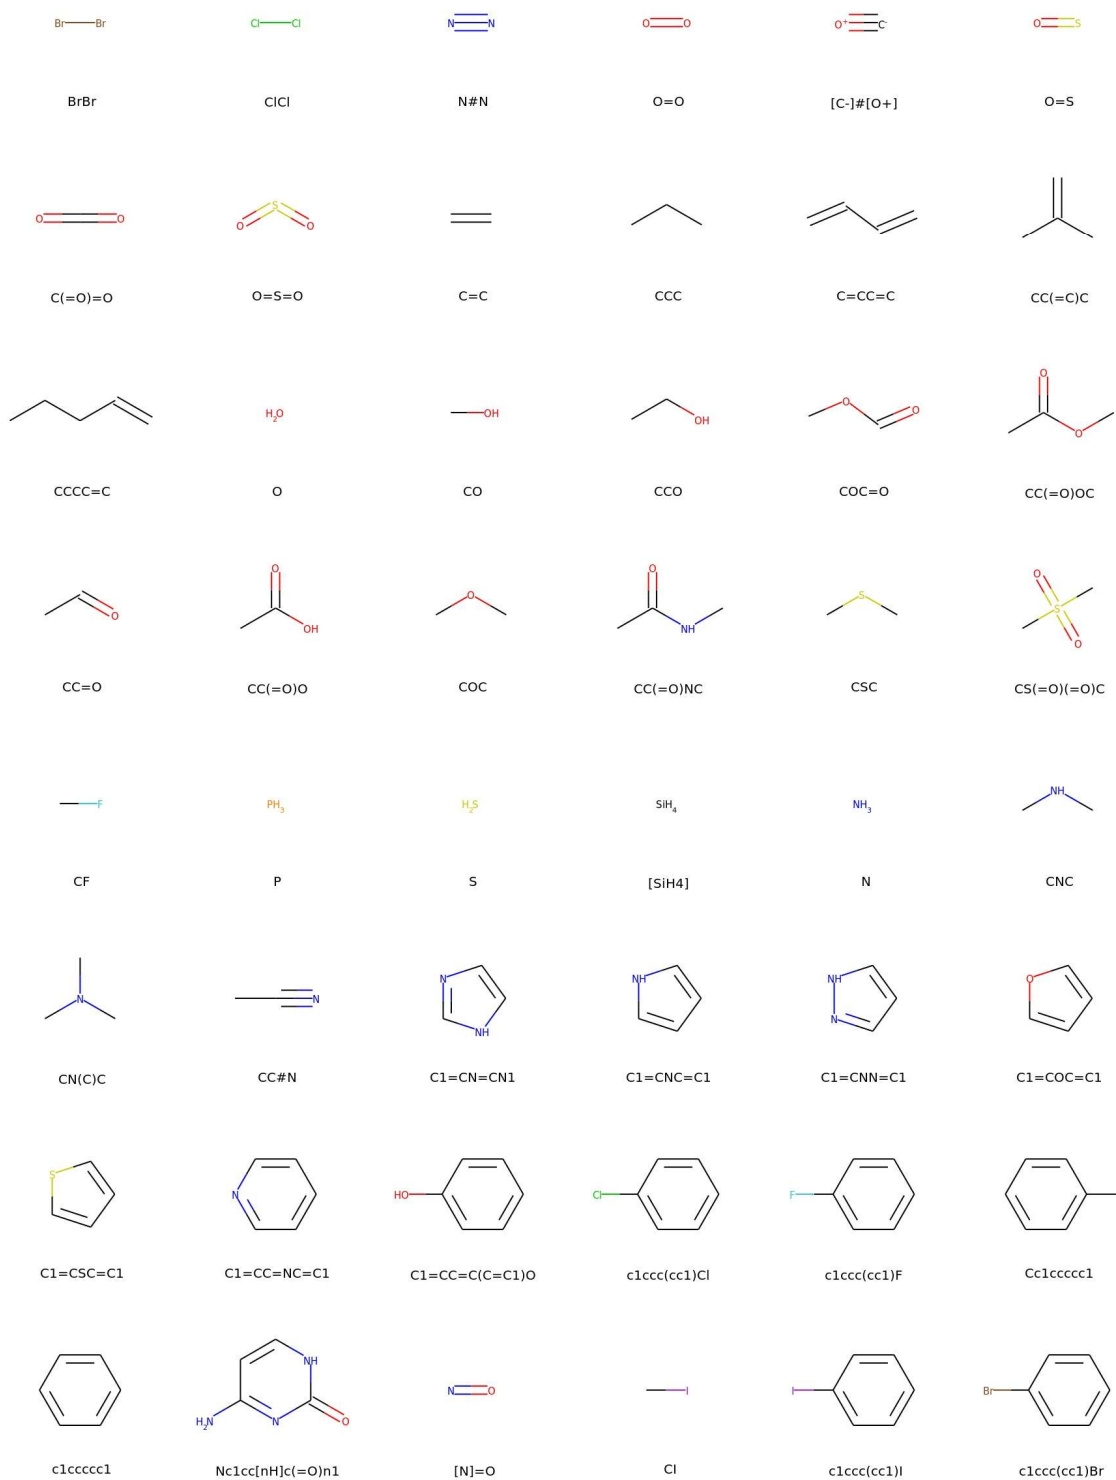

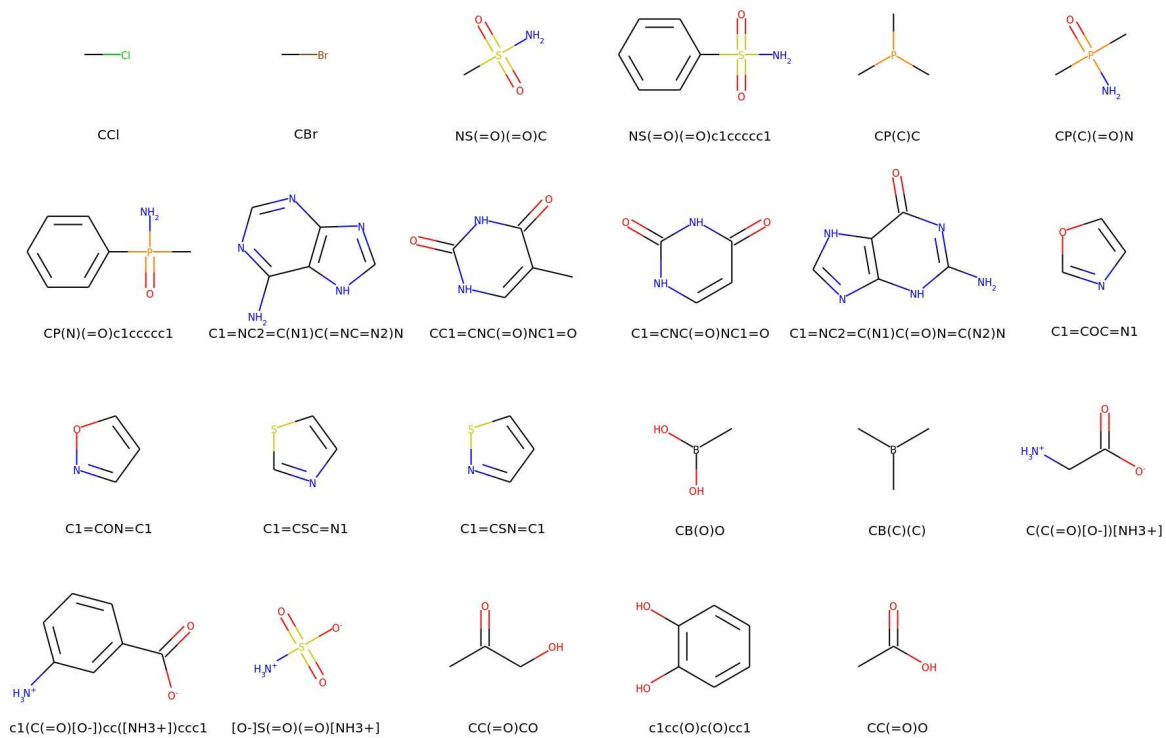

**Supplementary Figure 3: Molecules for QM benchmarking:** 71 molecules used for the benchmarking of different QM methods to a double-hybrid reference calculation

## 5. Starting parameters for the LJ optimization

---

Supplementary Note 1: Starting parameters for the LJ optimization. Epsilon values in kcal/mol and  $r_{\text{min\_half}}$  in Å.

```
<Atom smirks="#1:1" epsilon="0.0157" id="n1" rmin_half="1.4870"  
parameterize="rmin_half, epsilon"/>
```

```
<Atom smirks="#6:1" epsilon="0.1094" id="n2" rmin_half="1.9080"  
parameterize="rmin_half, epsilon"/>
```

```
<Atom smirks="#8:1" epsilon="0.1700" id="n3" rmin_half="1.6837"  
parameterize="rmin_half, epsilon"/>
```

```
<Atom smirks="#7:1" epsilon="0.1700" id="n20" rmin_half="1.8240"  
parameterize="rmin_half, epsilon"/>
```

```
<Atom smirks="#1:1-[#7,#8,#9,#16,#17,#35]" epsilon="5.27e-05" id="n8"  
rmin_half="0.300" parameterize="rmin_half, epsilon"/>
```



## 6. Experimental values

---

Supplementary Table 2: Experimental values used for training.

| Training Data             |                    |                                  |
|---------------------------|--------------------|----------------------------------|
| SMILES                    | Density<br>(g/mol) | Heat of Vaporization<br>(kJ/mol) |
| <chem>CCOCC</chem>        | 713                | 27.4                             |
| <chem>CC1=CC=CC=C1</chem> | 862                | 38.1                             |
| <chem>OC</chem>           | 787                | 37.8                             |
| <chem>COCCC</chem>        | 736                | 27.9                             |
| <chem>CCCN</chem>         | 733                | 35.8                             |
| <chem>C-C#N</chem>        | 787                | 33.4                             |
| <chem>CC(C)CC</chem>      | 620                | 25.2                             |
| <chem>Cc1ccc(C)cc1</chem> | 861                | 42.4                             |
| <chem>CC(=O)C</chem>      | 785                | 31.3                             |
| <chem>c1cocc1</chem>      | 973                | 27.7                             |
| <chem>N1(C)CCOCC1</chem>  | 919                | 40.0                             |
| <chem>c1ccccc1N</chem>    | 1022               | 55.8                             |
| <chem>CN</chem>           | 662                | 23.9                             |
| <chem>CCCCO</chem>        | 810                | 52.0                             |
| <chem>CC(C)O</chem>       | 785                | 45.5                             |

Supplementary Table 3: Experimental values used for testing.

| Test Data                             |                 |                               |                     |              |
|---------------------------------------|-----------------|-------------------------------|---------------------|--------------|
| SMILES                                | Density (g/mol) | Heat of Vaporization (kJ/mol) | Dielectric Constant | HFE (kJ/mol) |
| <chem>CCCCCCC</chem>                  | 680             | 36.7                          | 1.9                 | 11.2         |
| <chem>CCCCCCCCC</chem>                | 726             | 52.1                          | 2.0                 | 13.2         |
| <chem>CCCCCCCC</chem>                 | 699             | 41.8                          | 2.0                 | 12.0         |
| <chem>c1cccc1</chem>                  | 874             | 33.3                          | 2.3                 | -3.8         |
| <chem>CCCCNCCCC</chem>                | 756             | 50.8                          | 3.2                 | -13.6        |
| <chem>CCCCN(CCCC)CCCC</chem>          | 774             | 62.7                          | 2.3                 | -            |
| <chem>OCCCCO</chem>                   | 1014            | 77.1                          | 32.9                | -            |
| <chem>CCCCCCCCCCCCCCCC</chem>         | 770             | 81.3                          | 2.1                 | -            |
| <chem>OCC(O)CO</chem>                 | 1257            | 91.7                          | 13.2                | -56.2        |
| <chem>C1CCNCC1</chem>                 | 857             | 38.6                          | 5.8                 | -21.4        |
| <chem>CCCCCCCCN(CCCCCC)CCCCCCC</chem> | 807             | 100.1                         | -                   | -            |
| <chem>OCCCCCO</chem>                  | 994             | 83.0                          | 25.3                | -            |
| <chem>CC(=O)c1ccc(C)cc1</chem>        | 1005            | 60.7                          | -                   | -19.7        |
| <chem>CN(C)C(=N)N(C)C</chem>          | 913             | 49.9                          | 23.1                | -            |
| <chem>CNCCCN</chem>                   | 844             | 53.1                          | -                   | -            |
| <chem>CN(C)CCCN</chem>                | 813             | 53.1                          | -                   | -            |
| <chem>CCN(CC)CCCN</chem>              | 826             | 52.4                          | -                   | -            |
| <chem>CCCCCCCCCCCCCCCCCCCC</chem>     | 799             | 121.9                         | 2.1                 | -            |
| <chem>CCCCCCCCCCCCCCCCCCCC</chem>     | 794             | 111.9                         | 2.0                 | -            |
| <chem>CCn1ccnc1</chem>                | 995             | 57.5                          | -                   | -            |
| <chem>CN(C)CCCN(C)C</chem>            | 779             | 53.1                          | -                   | -            |
| <chem>CN=C=O</chem>                   | 923             | 28.7                          | 29.4                | -            |
| <chem>OCC#CCO</chem>                  | 1115            | 81.5                          | -                   | -            |
| <chem>N#Cc1cccc1</chem>               | 1065            | 44.8                          | -                   | -            |
| <chem>Cc1cccn1</chem>                 | 957             | 58.0                          | -                   | -            |
| <chem>O=Cc1ccoc1</chem>               | 1111            | 48.1                          | -                   | -            |
| <chem>Cc1ccc(C)n1C</chem>             | 807             | 50.7                          | -                   | -            |
| <chem>CC(=O)c1cccc1</chem>            | 1098            | 53.0                          | -                   | -            |
| <chem>CN1CCN(C)CC1</chem>             | 844             | 41.2                          | -                   | -31.7        |
| <chem>OCCCCCO</chem>                  | 967             | 90.2                          | -                   | -            |
| <chem>c1cn2ccnc2cn1</chem>            | 1165            | 62.0                          | -                   | -            |
| <chem>CCCN1ccnc1</chem>               | 945             | 63.9                          | -                   | -            |

|                                 |      |       |      |       |
|---------------------------------|------|-------|------|-------|
| <chem>CC(=O)CCC=C(C)C</chem>    | 855  | 50.8  | -    | -     |
| <chem>c1ccc2ccccc2c1</chem>     | 1162 | 54.6  | -    | -10.0 |
| <chem>NCCN1CCNCC1</chem>        | 985  | 68.7  | -    | -     |
| <chem>c1ccc2ncncnc2c1</chem>    | 1124 | 58.7  | -    | -     |
| <chem>OCCCCCCCO</chem>          | 951  | 97.9  | -    | -     |
| <chem>CC(C)(C)c1ccncc1</chem>   | 923  | 54.4  | -    | -     |
| <chem>Cc1ccc2c(c1)OCO2</chem>   | 1135 | 54.9  | -    | -     |
| <chem>CCCCC(=O)CCCC</chem>      | 822  | 54.7  | -    | -11.0 |
| <chem>O=C1CCc2ccccc2C1</chem>   | 1106 | 73.0  | -    | -     |
| <chem>OCCCCCCCCO</chem>         | 939  | 104.9 | -    | -     |
| <chem>CC(C)(O)CCC(C)(C)O</chem> | 898  | 85.2  | -    | -     |
| <chem>NCCNCCNCCN</chem>         | 982  | 84.7  | 11.4 | -     |
| <chem>CCOCC</chem>              | -    | -     | -    | -6.7  |
| <chem>CC1=CC=CC=C1</chem>       | -    | -     | -    | -3.8  |
| <chem>OC</chem>                 | -    | -     | -    | -21.3 |
| <chem>COCCC</chem>              | -    | -     | -    | -6.9  |
| <chem>CCCN</chem>               | -    | -     | -    | -18.4 |
| <chem>C-C#N</chem>              | -    | -     | -    | -16.2 |
| <chem>CC(C)CC</chem>            | -    | -     | -    | 10.0  |
| <chem>Cc1ccc(C)cc1</chem>       | -    | -     | -    | -3.3  |
| <chem>CC(=O)C</chem>            | -    | -     | -    | -15.9 |
| <chem>c1cocc1</chem>            | -    | -     | -    | -     |
| <chem>N1(C)CCOCC1</chem>        | -    | -     | -    | -26.4 |
| <chem>c1ccccc1N</chem>          | -    | -     | -    | -23.0 |
| <chem>CN</chem>                 | -    | -     | -    | -19.0 |
| <chem>CCCCO</chem>              | -    | -     | -    | -19.7 |
| <chem>CC(C)O</chem>             | -    | -     | -    | -19.8 |

## 7. Mean signed errors as function of mixing parameter $\delta$

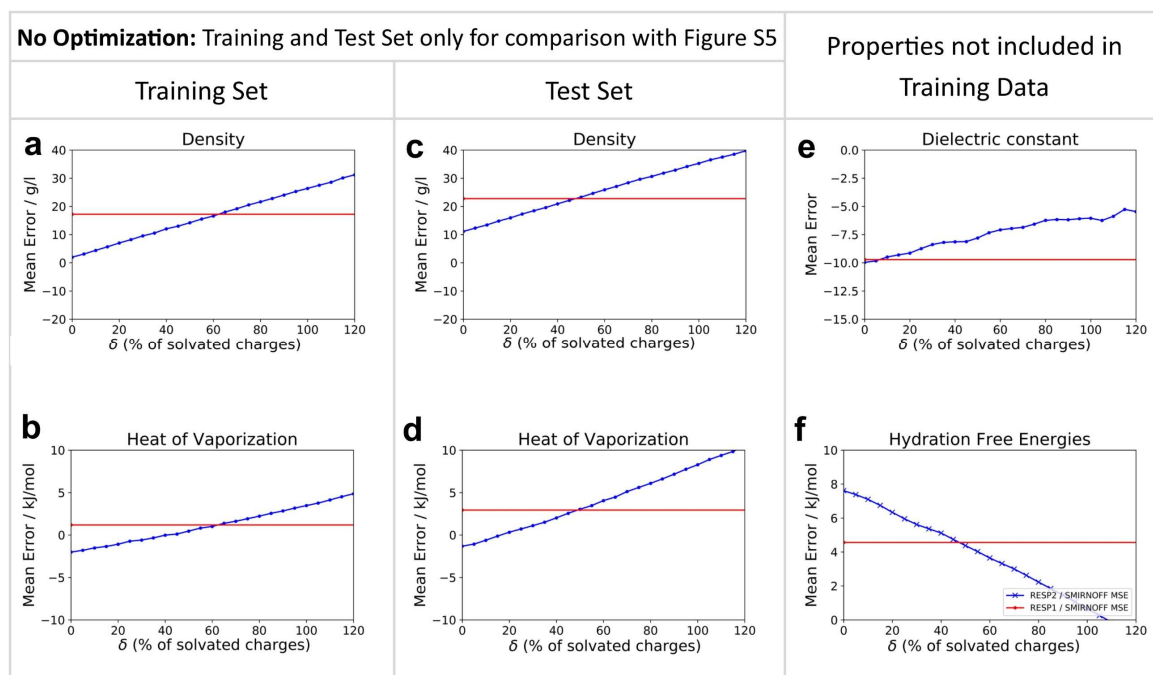

**Supplementary Figure 4: Mean unsigned error with SMIRNOFF Lennard-Jones parameters:** Mean signed error of simulated results, relative to experiment, as a function of the charge mixing parameter  $\delta$  with SMIRNOFF LJ parameters. No parameters are optimized for these results. Separation of training and test set is kept to make comparison with Figure S5 easier. Mean unsigned error for densities and HOV for the training-set (a,b) and test-set (c,d). Mean unsigned error for the dielectric constants (e) of the test-set and HFE error for all molecules in the FreeSolv database and either in the test or training-set (f). The red line are results obtained with RESP1 charges and is used as a reference.

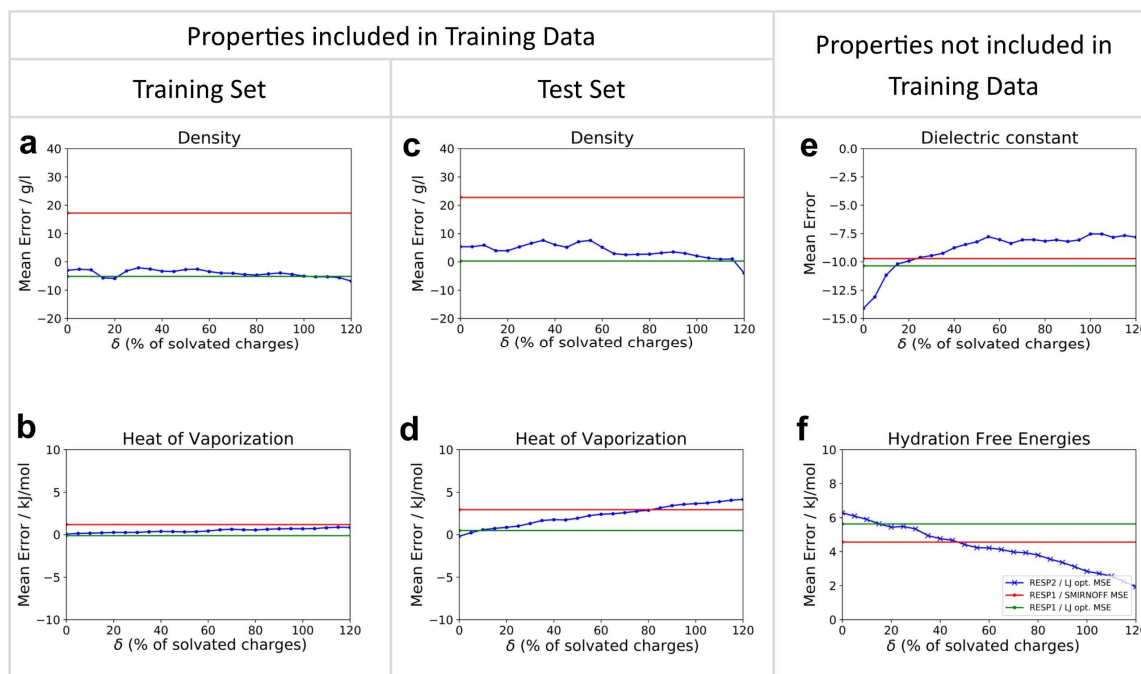

**Supplementary Figure 5: Mean signed error with reoptimized Lennard-Jones parameters:** Mean signed error between theoretical and experimental results as a function of the charge mixing parameter  $\delta$  with optimized LJ parameters. Mean unsigned error for densities and HOV for the training-set (a,b) and test-set (c,d). Mean unsigned error for the dielectric constants (e) for the test-set and HFE error for all molecules in the FreeSolv database and either in the test or training-set (f). The red line are results obtained with RESP1 charges and is used as a reference.

## 8. Sample results with only one hydrogen LJ type

---

Supplementary Table 4: Mean unsigned errors obtained with LJ parameters trained in the context of RESP<sub>2.0,5</sub> partial charges, with separate LJ types for polar and nonpolar hydrogens and for a single hydrogen type. Densities in g/l, heats of vaporization in kJ/mol

|                                           | <b>Polar and nonpolar H types</b> | <b>Single H type</b> |
|-------------------------------------------|-----------------------------------|----------------------|
| <b>Training set densities</b>             | 19.1                              | 27.1                 |
| <b>Training set heats of vaporization</b> | 2.28                              | 4.75                 |
| <b>Test set densities</b>                 | 37.7                              | 38.7                 |
| <b>Test set heats of vaporization</b>     | 6.61                              | 10.53                |

## 9. Optimized LJ parameters

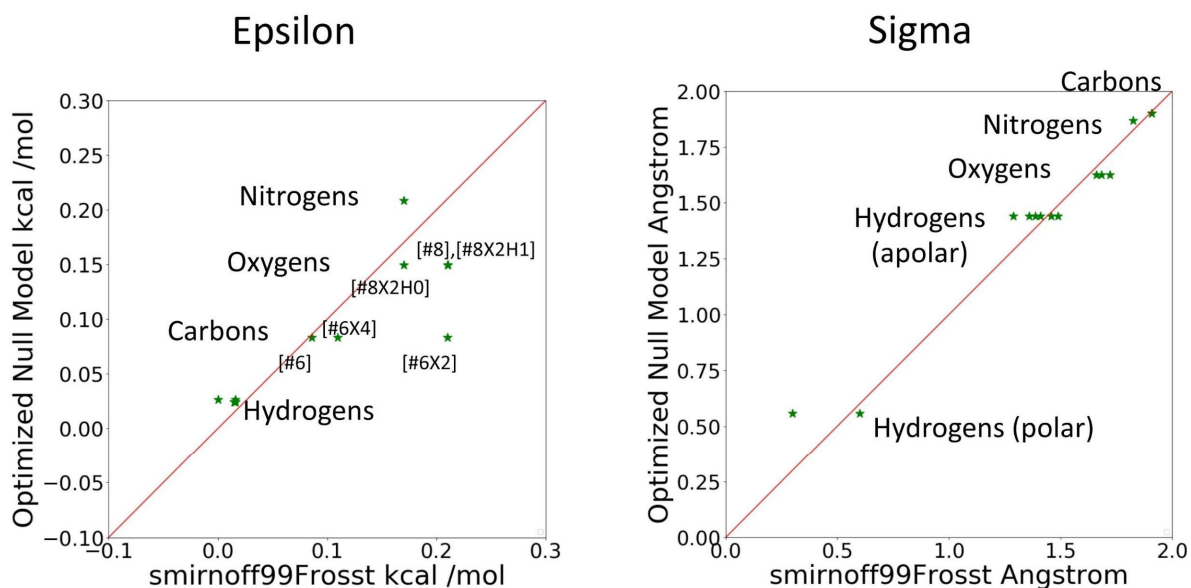

**Supplementary Figure 6: Changes in LJ parameters:** Parameter changes for atoms in the test and training sets between SMIRNOFF and the reduced LJ set optimized with RESP<sub>2 $\delta$ =0.5</sub>. Instead of seven hydrogen types, the reduced set distinguish between polar and apolar hydrogens. The three carbon terms are all reduced to one type, as well as the three oxygen types. For nitrogen, only one atom type exists in SMIRNOFF and is kept. Select SMIRNOFF LJ types are labelled with SMIRKS strings.

Supplementary Note 2: Optimized LJ parameters for RESP<sub>2 $\delta$ =0.5</sub>. Epsilon values in kcal/mol and rmin\_half in Å.

```
<Atom smirks="#1:1" epsilon="2.442425552763e-02" id="n1"  
rmin_half="1.441450206517e+00" parameterize="rmin_half, epsilon"/>
```

```
<Atom smirks="#6:1" epsilon="8.316545253750e-02" id="n2"  
rmin_half="1.900104117994e+00" parameterize="rmin_half, epsilon"/>
```

```
<Atom smirks="#8:1" epsilon="1.494128902689e-01" id="n3"  
rmin_half="1.625860788705e+00" parameterize="rmin_half, epsilon"/>
```

```
<Atom smirks="#7:1" epsilon="2.085804532765e-01" id="n20"  
rmin_half="1.867010746380e+00" parameterize="rmin_half, epsilon"/>
```

```
<Atom smirks="#1:1-#7,#8,#9,#16,#17,#35" epsilon="2.658179674558e-02" id="n8"  
rmin_half="5.582920055246e-01" parameterize="rmin_half, epsilon"/>
```

Supplementary Note 3: Optimized LJ parameters for RESP<sub>2 $\delta$ =0.6</sub>. Epsilon values in kcal/mol and rmin\_half in Å.

```
<Atom smirks="[#1:1]" epsilon="2.276530034185e-02" id="n1"
rmin_half="1.439694431063e+00" parameterize="rmin_half, epsilon"/>

  <Atom smirks="[#6:1]" epsilon="8.400150760454e-02" id="n2"
rmin_half="1.912583986068e+00" parameterize="rmin_half, epsilon"/>

  <Atom smirks="[#8:1]" epsilon="1.504628783063e-01" id="n3"
rmin_half="1.665073160695e+00" parameterize="rmin_half, epsilon"/>

  <Atom smirks="[#7:1]" epsilon="2.061685252086e-01" id="n20"
rmin_half="1.876266733552e+00" parameterize="rmin_half, epsilon"/>

  <Atom smirks="[#1:1]-[#7,#8,#9,#16,#17,#35]" epsilon="2.672963104223e-02" id="n8"
rmin_half="5.389607651519e-01" parameterize="rmin_half, epsilon"/>
```

Supplementary Note 4: Optimized LJ parameters for RESP1. Epsilon values in kcal/mol and rmin\_half in Å.

```
<Atom smirks="[#1:1]" epsilon="2.007373778833e-02" id="n1"
rmin_half="1.426322194675e+00" parameterize="rmin_half, epsilon"/>

  <Atom smirks="[#6:1]" epsilon="8.285788790985e-02" id="n2"
rmin_half="1.938260037810e+00" parameterize="rmin_half, epsilon"/>

  <Atom smirks="[#8:1]" epsilon="1.668165991003e-01" id="n3"
rmin_half="1.698013216722e+00" parameterize="rmin_half, epsilon"/>

  <Atom smirks="[#7:1]" epsilon="1.811757801757e-01" id="n20"
rmin_half="1.847472233860e+00" parameterize="rmin_half, epsilon"/>

  <Atom smirks="[#1:1]-[#7,#8,#9,#16,#17,#35]" epsilon="7.437389444686e-03" id="n8"
rmin_half="3.198481741167e-01" parameterize="rmin_half, epsilon"/>
```

All optimized FF files are also available on GitHub in a machine readable format.
